# Supplementary material for: Computational identification of biologically functional non-hairpin GC-helices in human Argonaute mRNA
Source: PubMed Central journal article supplement (PMC3626786; doi:10.1186/1471-2105-14-122), 2013-04-10
Supplement: 1471-2105-14-122-S1.pdf [file 1471-2105-14-122-S1.pdf]

## Supplementary Data

**Table S1:** Parameters for duplex definition. The software tool provides seven free parameters to specify duplex classes. It is possible to restrict base composition, different characteristics of the inter-segment sequence which may be longer, shorter or adopt other structures, and the number of consecutive base pairs with the duplex of interest. Columns 1-3 describe these parameters; columns 4-11 define duplex classes as used in this study.

| parameter       | description                                                     | co-domain           | duplex | helix | stem  | AU-duplex | AU-helix | GC-duplex | GC-helix | GC-stem |
|-----------------|-----------------------------------------------------------------|---------------------|--------|-------|-------|-----------|----------|-----------|----------|---------|
| min_dist        | minimal length of the inter-segment sequence                    | $\mathbb{N}^0$ (nt) | 0      | 40    | ULTD  | 0         | 40       | 0         | 40       | 0       |
| min_linker_pair | minimal number of bp in inter-segment sequence                  | $\mathbb{N}^0$ (bp) | 0      | 6     | 0     | 0         | 6        | 0         | 6        | 0       |
| max_dist        | maximal length of the inter-segment sequence                    | $\mathbb{N}^0$ (nt) | ULTD   | ULTD  | 39    | ULTD      | ULTD     | ULTD      | ULTD     | 39      |
| max_linker_pair | maximal number of bp in inter-segment sequence                  | $\mathbb{N}^0$ (bp) | ULTD   | ULTD  | 5     | ULTD      | ULTD     | ULTD      | ULTD     | 5       |
| min_len         | minimal number of consecutive bp with the duplex of interest    | $\mathbb{N}$ (bp)   | 8      | 8     | 8     | 8         | 8        | 8         | 8        | 8       |
| anti_parallel   | whether duplex formation between anti-parallel strands is valid | Boolean             | FALSE  | FALSE | FALSE | FALSE     | FALSE    | FALSE     | FALSE    | FALSE   |
| max_AU          | maximal number of AU bp allowed in duplex                       | $\mathbb{N}^0$ (nt) | ULTD   | ULTD  | ULTD  | ULTD      | ULTD     | 0         | 0        | 0       |
| max_GU          | maximal number of GU bp allowed in duplex                       | $\mathbb{N}^0$ (nt) | ULTD   | ULTD  | ULTD  | 0         | 0        | 0         | 0        | 0       |
| max_GC          | maximal number of GC bp allowed in duplex                       | $\mathbb{N}^0$ (nt) | ULTD   | ULTD  | ULTD  | 0         | 0        | ULTD      | ULTD     | ULTD    |

**Table S2:** List of mRNA sequences included in the study. **A** We restricted to mRNAs with intact 3'-UTR, CDS, and 5'-UTR. 77 sequences of human origin, inclusive 10 mRNAs of the Argonaute gene family. **B** 49 sequences of non-human Argonaute orthologs plus 13 predicted ones. **C** 28 non-coding RNA transcripts from *Homo sapiens* and *Mus musculus*. All sequences are freely available online at resources like EMBL Nucleotide Sequence Database (<http://www.ebi.ac.uk/embl/>) and NCBI Nucleotide (<http://www.ncbi.nlm.nih.gov/nucleotide>).

**A**

| name         | Accession          |
|--------------|--------------------|
| ACIN1        | NM_014977          |
| ALDH7A1      | NM_001182          |
| API5-1       | NM_001142930       |
| APP-2        | NM_201413          |
| ATG13-1      | NM_001142673       |
| ATP1A1-4     | NM_001160234       |
| BCKDHB-1     | NM_183050          |
| CCDC120-1    | NM_001163321       |
| CD36         | NM_001001548       |
| COL2A-1      | NM_001844          |
| COX2         | NM_000963          |
| CP-2         | NM_000096          |
| DMD-Dp71b    | NM_004016          |
| E2F3         | NM_001949          |
| FGFR2-7      | NM_001144917       |
| FGFR3-1      | NM_000142          |
| GRM7-1       | NM_000844          |
| HIV-1-pNL4-3 | AF324493           |
| ICAM1        | P05362 (SwissProt) |
| INPPL1       | NM_001567          |
| IPO13        | NM_014652          |
| ITG-AV       | NM_002210          |
| ITGAM        | NM_001145808       |

| name              | Accession     |
|-------------------|---------------|
| SAPS3-2           | NM_001164163  |
| SCIDA-2           | NM_022487     |
| SELE              | XM_057446     |
| SLC25A12          | NM_003705     |
| SLC6A4            | NM+AF8-001045 |
| SLCO2B1           | NM_007256     |
| STOX2             | BC146754      |
| STXBP1-1          | NM_003165     |
| TCF7L2-2          | NM_030756     |
| TIAL1-2           | NM_001033925  |
| TMEM2             | BC146780      |
| TRP3-1            | NM_001130698  |
| UNC51-2           | NM_001142610  |
| USP19             | BC146752      |
| WFS1              | NM_001145853  |
| ZNF828            | NM_001164145  |
| hAGO1 (EIF2C1)    | NM_012199     |
| hAGO2 (EIF2C2)    | NM_012154     |
| hAGO3-1 (EIF2C3)  | NM_024852     |
| hAGO3-2 (EIF2C3)  | NM_177422     |
| hAGO4 (EIF2C4)    | NM_017629     |
| phosphodiesterase | L20971        |
| PIWIL1 (HIWI)     | NM_004764     |

| name         | Accession    |
|--------------|--------------|
| KTN-1        | NM_182926    |
| LAMB3        | NM_001127641 |
| LAP2-1       | NM_001017963 |
| MANEA        | BC146671     |
| MYB          | M15024       |
| MYB-1        | NM_001130173 |
| NHE5         | NM_004594    |
| NOS3-1       | NM_000603    |
| PGY1         | M14758       |
| PLOD2        | NM_000935    |
| PRKD1        | NM_002742    |
| PROM1        | NM_006017    |
| RAD4-2       | NM_001145769 |
| RAF1         | XM_051583    |
| Rab11-FIP3-1 | NM_014700    |

| name                  | Accession    |
|-----------------------|--------------|
| PIWIL2-1 (HILI-1)     | NM_001135721 |
| PIWIL2-2 (HILI-2)     | NM_018068    |
| PIWIL3                | NM_001008496 |
| PIWIL4 (HIWI2, HILI2) | NM_152431    |
| DCR1-T1               | NM_030621    |
| DCR1-T2               | NM_177438    |
| RNASEN-T1             | NM_013235    |
| RNASEN-T2             | NM_001100412 |
| TP53-ISOA-T1          | NM_000546    |
| TP53-ISOA-T2          | NM_001126112 |
| TP53-ISOB-T3          | NM_001126114 |
| TP53-ISOC-T4          | NM_001126113 |
| TP53-ISOD-T5          | NM_001126115 |
| TP53-ISOE-T6          | NM_001126116 |
| TP53-ISOF-T7          | NM_001126117 |

**B**

| name          | origin            | Accession    |
|---------------|-------------------|--------------|
| Ago3b         | Danio rerio       | NM_001160028 |
| Ago4          | Danio rerio       | NM_001252559 |
| ZILI (piwil2) | Danio rerio       | NM_001080199 |
| ZIWI (piwil1) | Danio rerio       | NM_183338    |
| AGO1          | Rattus norvegicus | NM_001191765 |
| AGO2          | Rattus norvegicus | NM_001271193 |
| AGO4 (Eif2c4) | Rattus norvegicus | NM_001106686 |
| PIWIL1        | Rattus norvegicus | NM_001108853 |
| PIWIL2-2      | Rattus norvegicus | NM_001107276 |

| <b>name</b>                    | <b>origin</b>           | <b>Accession</b> |
|--------------------------------|-------------------------|------------------|
| MILI (PIWIL2)                  | Mus musculus            | NM_021308        |
| MIWI (PIWIL1)                  | Mus musculus            | NM_021311        |
| MIWI2 (PIWIL4)                 | Mus musculus            | AB258534         |
| AGO1clone (Eif2c1, meIF2C1)    | Mus musculus            | AK080954         |
| AGO2 (Eif2c2, GERp95, meIF2C2) | Mus musculus            | NM_153178        |
| AGO2 (alternative)             | Mus musculus            | NM_153178        |
| AGO3 (Eif2c3)                  | Mus musculus            | NM_153402        |
| AGO4 (Eif2c4)                  | Mus musculus            | NM_153177        |
| AGO1-A                         | Drosophila melanogaster | NM_166020        |
| AGO1-B                         | Drosophila melanogaster | NM_079010        |
| AGO1-C                         | Drosophila melanogaster | NM_166021        |
| AGO2-B                         | Drosophila melanogaster | NM_140518        |
| AGO2-C                         | Drosophila melanogaster | NM_168626        |
| AGO2-C (alternative)           | Drosophila melanogaster | NM_168626        |
| AGO2-E                         | Drosophila melanogaster | NM_001274953     |
| AGO3-D                         | Drosophila melanogaster | NM_001043162     |
| AGO3-E                         | Drosophila melanogaster | NM_001043164     |
| AGO3-F                         | Drosophila melanogaster | NM_001043163     |
| AUB-A                          | Drosophila melanogaster | NM_057386        |
| AUB-C                          | Drosophila melanogaster | NM_001103674     |
| PIWI                           | Drosophila melanogaster | NM_057527        |
| AGO2 (EIF2C2)                  | Oryctolagus cuniculus   | NM_001082710     |
| PIWIL2-t2 (predicted)          | Canis lupus familiaris  | XM_853957        |
| EIF2C1-t1 (predicted)          | Pan troglodytes         | XM_001167251     |
| Ago (TSA)                      | Pan troglodytes         | GABF01000457     |
| Ago (TSA)                      | Pan troglodytes         | GABD01009992     |
| EIF2C1-t2 (predicted)          | Pan troglodytes         | XM_001167312     |

| <b>name</b>           | <b>origin</b>         | <b>Accession</b> |
|-----------------------|-----------------------|------------------|
| EIF2C1-t3 (predicted) | Pan troglodytes       | XM_001167349     |
| EIF2C1-t4 (predicted) | Pan troglodytes       | XM_513312        |
| EIF2C2-t1 (predicted) | Pan troglodytes       | XM_001142838     |
| EIF2C2-t2 (predicted) | Pan troglodytes       | XM_001143064     |
| EIF2C3-t1 (predicted) | Pan troglodytes       | XM_001167488     |
| EIF2C3-t2 (predicted) | Pan troglodytes       | XM_001167515     |
| EIF2C3-t3 (predicted) | Pan troglodytes       | XM_001167651     |
| EIF2C3-t4 (predicted) | Pan troglodytes       | XM_001167675     |
| EIF2C3-t5 (predicted) | Pan troglodytes       | XM_524664        |
| Ago1                  | <i>Bos taurus</i>     | NM_001205899     |
| Ago2                  | <i>Bos taurus</i>     | BT030588         |
| Ago2 (alternative)    | <i>Bos taurus</i>     | BC151491         |
| Ago3                  | <i>Gallus gallus</i>  | NM_001030900     |
| Ago4                  | <i>Gallus gallus</i>  | NM_001039276     |
| Ago (TSA)             | Macaca mulatta        | JU475189         |
| Ago (TSA)             | Mustela putorius furo | JP009204         |
| Ago2                  | Oryctolagus cuniculus | NM_001082710     |
| Ago1                  | <i>Sus scrofa</i>     | NM_001194976     |
| Ago2                  | <i>Sus scrofa</i>     | NM_001194975     |
| Ago3                  | <i>Sus scrofa</i>     | NM_001194974     |
| Ago4                  | <i>Sus scrofa</i>     | NM_001194972     |
| Ago1 (clone)          | <i>Xenopus laevis</i> | BC077863         |
| Ago2                  | <i>Xenopus laevis</i> | NM_001093519     |
| Ago2 (clone)          | <i>Xenopus laevis</i> | CR761661         |
| Ago4                  | <i>Xenopus laevis</i> | NM_001096105     |

C

| <b>name</b>                       | <b>origin</b>     | <b>Accession</b> |
|-----------------------------------|-------------------|------------------|
| HOTAIR-t1                         | Homo sapiens      | NR_047517        |
| HOTAIR-t2                         | Homo sapiens      | NR_003716        |
| JPX                               | Homo sapiens      | NR_024582        |
| PCAT1                             | Homo sapiens      | HQ605084         |
| PCAT14                            | Homo sapiens      | HQ605085         |
| SUZ12                             | Homo sapiens      | NM_015355        |
| Tsix                              | Homo sapiens      | NR_003255        |
| lincRNA-ST8SIA3                   | Homo sapiens      | HQ315778         |
| intergenic non-protein coding RNA | Homo sapiens      | JX088243         |
| Tsix                              | Homo sapiens      | NR_002844        |
| Xist-t1                           | Mus musculus      | NR_001463        |
| Xist-t2                           | Mus musculus      | NR_001570        |
| AIR-t1                            | Mus musculus      | DQ275619         |
| AIR-t1b                           | Mus musculus      | DQ275617         |
| AIR-t2                            | Mus musculus      | DQ275620         |
| AIR-t3                            | Mus musculus      | DQ275618         |
| Igf2r-as-Airn-t1                  | Mus musculus      | NR_027773        |
| Igf2r-as-Airn-t2                  | Mus musculus      | NR_027772        |
| Igf2r-as-Airn-t3                  | Mus musculus      | DQ220013         |
| Igf2r-as-Airn-t4                  | Mus musculus      | NR_027784        |
| Igf2r-as-t1                       | Mus musculus      | DQ220010         |
| Igf2r-as-t2                       | Mus musculus      | DQ220012         |
| Igf2r-as-t3                       | Mus musculus      | NR_002853        |
| Igf2r-as-t4                       | Mus musculus      | DQ220011         |
| Igf2r-as-t5                       | Mus musculus      | DQ220014         |
| Xist                              | <i>Bos taurus</i> | NR_001464        |

**Table S3:** Plasmid sequences of pRL-AGO2 and pRL-AGO2mut.

|                         |                                           |
|-------------------------|-------------------------------------------|
| <b>colour coding:</b>   |                                           |
| blue                    | CMV promoter                              |
| brown                   | TATA-Box / start of transcription for CMV |
| <u>black underlined</u> | cloning site SacI/NheI                    |
| <u>blue underlined</u>  | sequence primer                           |
| red                     | Ago2 (244nt)                              |
| <u>red underlined</u>   | mutations Ago2                            |
| green                   | AUG Ago2                                  |
| yellow                  | ORF Renilla-Luciferase                    |
| pink                    | glycin linker                             |

> pRL-AGO2 (pRL-CMV\_Ago2\_244\_SacI\_NheI)

AGATCTTCAATATTTGGCCATTAGCCATATTTATTTCATTGGTTATATAGCATAAAATCAATATTTGGCTATTGGCCATTGCATACGTTGTATCTATATCATAAATGTACATTTATATTGGCTCATGTCCAAT  
ATGACCGCCATGTTGGCATTGATTTATTGACTAGTTATTAATAGTAATCAATTTACGGGGTTCATTAGTTTCATAGCCCATATATGGAGTTCCGGTTACATAAATTTACGGTAAATGGCCCGCTGGCTGACC  
GCCAACGACCCCGCCCATTTGACGTCAATAATGACGTATGTTCCCATAGTAACGCCAATAGGGACTTTCCATTGACGTCAATGGGTGGAGTATTTACGGTAACTGCCACTTGGCAGTACATCAAGT  
GTATCATATGCCAAGTCCGCCCTATTGACGTCAATGACGGTAAATGGCCCGCTGGCATTTATGCCAGTACACCTTTACGGGACTTTCTACTTTGGCAGTACATCTACGTATTAGTCATCGCTAT  
TACCATGGTGTATGCGGTTTTGGCAGTACACCAATGGGCGTGGATAGCGGTTTACTCACGGGATTTCCAAGTCTCCACCCATTGACGTCAATGGGAGTTTGTTTTTGGCACAAAATCAACGGGACTT  
TCCAAAATGTCTGTAATAACCCCGCCCGCTTGACGCAAAATGGGCGGTAGGCGTGTACGGTGGGAGGTCATATATAAGCAgagctcGTTTTAGTGAACC

**GGGCCGCCCTCGGCCCGGAGCCCTCGGCCG  
GCCACCCTTACTCGGGAGCCCGCCCGCACTTGCACCTCTGCGCCGCGCCCGCCCATCCAAGGATATGCTTCAAGCCTCCACCTAGACCCGACTTTGGGACCTCCGGGAGAACAATCAAATTACAG  
GCCAATTTCTTCGAAATGGACATCCCCAAAATTTGACATCTATCATTTATGAAATGGATATCAAGCCAGAGAAGTGCCTCGAGGggtggcggaggtggcggattgctagcCACCATGACTTCGAAAGTTTTAT  
GATCCAGAACAAGGAAACGGATGATAACTGGTCCGCACTGGTGGCCAGATGTAACAACAATGAATGTTCTTGATTCATTTATTAATTTATGATTCAGAAAAACATGCAGAAAATGCTGTTATTTTT  
TTACATGGTAACGCGCCCTCTTCTTATTTATGGCGACATGTTGTGCCACATATTGAGCCAGTAGCGCGGTGATTTATACCAGACCTTATTTGGTATGGGCAAAATCAGGCAAAATCTGGTAATGGTCTTTAT  
AGGTTACTTGATCATTACAAATATCTTACTGCATGGTTGAACTTCTTAATTTACCAAAGAAGATCATTTTTGTTCGGCCATGATTTGGGGTGTCTGTTTGGCATTTCATTTAGCTATGAGCATCAAGAT  
AAGATCAAAGCAATAGTTACGCTGAAAGTGTAGTAGATGTGATTTGAATCATGGGATGAATGGCCTGATATGAAGAAGATATTCGCTTGATCAAATCTGAAGAAGGAGAAAAAATGGTTTTGGAGAAT  
AACTTCTTCGTGGAACCATGTTGCCATCAAAAATCATGAGAAAGTTAGAACCAGAAGAATTTGCAGCATACTTGAACCAATTCAAAGAGAAAGGTGAAGTTCGTCGTCCAACTTATCATGGCCCTCGT  
GAAATCCCGTTAGTAAAAGGTGGTAAACCTGACGTTGTACAAATTTGTTAGGAATATAATGCTTATCTACGTGCAAGTGTGATTTACCAAAAATGTTTATGAATCGGACCCAGGATTTCTTTCCAAT  
GCTATTTGTTGAAGGTGCCAAGAAGTTTCTTAATACTGAATTTGTCAAAGTAAAAGGTCTTCATTTTTTCGCAAGAAGATGCACCTGATGAAATGGGAAAATATATCAAATCGTTGTTGAGCGAGTTCTC  
AAAAATGAACAAATAATTCTAGAGCGGCCGCTTCGAGCAGACATGATAAAGATACATTTGATGAGTTTGGACAAACCACTAGAATGCAGTAAAAAATGCTTTATTTGTGAAATTTGTGATGCTATTG  
CTTTATTTGTAACCATTATAAGCTGCAATAAACAAGTTAACAACAACAATTTGCATTCATTTTATGTTTTCAGGTTTCAGGGGAGGTGTGGGAGGTTTTTTAAAGCAAGTAAACCTCTACAAATGTGGTA  
AAATCGATAAGGATCCAGGTGGCACTTTTTCGGGGAAATGTGCGCGGAACCCCTATTTGTTTTATTTTTCTAAATACATTCAAATATGATCCGCTCATGAGACAATAACCCGATAAAATGCTCAATAAT  
ATTGAAAAAGGAAGAGTATGATTTCAACATTTCCGTGTCGCCCTTATTCCTTTTTTGGCGCATTTTGCCTTCTGTTTTTGTCTACCCAGAAACGCTGGTGAAGTAAAAGATGCTGAAGATCAGT  
TGGGTGCAGTGGTGGTTCGAACTCGAAGTGGTCTCAACAGCGGTAAGATCTTGAGAGTTTTTCGCCCGCAAGACGTTTTTCCAATGATGAGCACTTTTAAAGTTCTGCTATGTGGCGCGGTATTATCCC  
GTATTGACGCCGGGCAAGAGCAACTCGGTCCGCCATACACTATTCTCAGAAATGACTTGGTTGAGTACTCACCAGTACAGAAAAGCATCTTACGGATGGCATGACAGTAAGAGAATTATGCAGTGTCTG  
CCATAACCATGAGTGATAAAGTTCGCGCAACTTACTTCTGACAACGATCGGAGGACCCGAAGGAGCTAACCCGTTTTTTGACAACATGGGGATCATGTAAGTTCGCTTGTGCGTTGGGAACCGGAGC  
TGAATGAAGCCATACCAAACGACGAGCGTGACACCAGATGCTGTAGCAATGGCAACAACGTTGCGCAACTATTAACGGGCAACTACTTACTCTAGCTTCCCGGCAACAATTAATAGACTGGATGG  
AGCGGATAAAGTTGCAGGACCACTTCTGCGCTCGGCCCTTCCGGTGGCTGGTTTTATTGCTGATAAATCTGGAGCCGGTGAAGTGGTCTCGCGGTATCTGAGCACTGGGGCCAGATGGTAAGC  
CTCCCGTATCGTAGTTATCTACACGACGGGGAGTCAAGCAACTATGGATGAACGAAATAGACAGATCGCTGAGATAGGTGCTCACTGATTAAGCATTTGGTAACTGTGACAGCAAGTTTACTCATATA  
TACTTTAGATTTGATTTAAACTTCATTTTTTAATTTAAAAGGATCTAGGTGAAGATCCTTTTTGATAAATCTCATGACCAAAATCCCTTAACTGAGTTTTTCTGTTCCACTGAGCGTCAGACCCCGTAGAAA  
AGATCAAAGGATCTTCTTGAGATCCTTTTTTCTGCGCGTAATCTGCTGCTTGCAAAACAAAAAACACCGCTACCAGCGGTGGTTTTGTTTGGCGGATCAAGAGCTACCAACTCTTTTTCCGAAGGTAA  
CTGGCTTCAGCAGAGCGCAGATACCAATACTGTTCTTCTAGTGTAGCCGTAGTTAGGCCACCCTCAAGAACTCTGTAGCACCCTACATACCTCGCTGCTAATCTGTTACCAGTGGCTGCTG**

CCAGTGGCGATAAGTCGTGCTTACCGGGTTGGACTCAAGACGATAGTTACCGGATAAGGCGCAGCGGTCCGGCTGAACGGGGGGTTCGTGCACACAGCCCAGCTTGGAGCGAACGACCTACACCGAAC
TGAGATACCTACAGCGTGAGCTATGAGAAAAGCGCCACGCTTCCCGAAGGGAGAAAAGGCGGCACAGGTATCCGGTAAGCGGCAGGGTTCGGAACAGGAGAGCGCACGAGGGAGCTTCCAGGGGGAAACGCCT
GGTATCTTTATAGTCTGTGCTGGTTTCGCCACCTCTGACTTGAGCGTCGATTTTGTGTATGCTCGTCAGGGGGGCGGAGCCTATGGAAAAACGCCAGCAACCGCGCCTTTTACGGTTCCTGGCCTTTT
GCTGGCCTTTTGTCTACATGGCTCGAC

> pRL-AGO2mut (pRL-CMV\_Ago2\_244\_SacI\_NheI\_D1/D2mut)

AGATCTTCAATATTTGGCCATTAGCCATATTATTCATTGGTTATATAGCATAAATCAATATTGGCTATTGGCCATTGCATACGTTGTATCTATATCATAATATGTACATTTATATTGGCTCATGTCCAAT
ATGACCGCCATGTTGGCATTGATATTGACTAGTTATTAATAGTAATCAATTACGGGGTTCATTAGTTCATAGCCATATATGGAGTTCGGGTTACATAACTTACGGTAAATGGCCCGCCTGGCTGACC
GCCAACGACCCCCGCCCATTTGACGTCAATAATGACGTATGTTCCCATAGTAACGCCAATAGGGACTTTCCATTGACGTCAATGGGTGGAGTATTTACGGTAAACTGCCCACTTGGCAGTACATCAAGT
GTATCATATGCCAAGTCCGCCCTATTGACGTCAATGACGTTAAATGGCCCGCCTGGCATTATGCCAGTACATGACCTTACGGGACTTCTACTTGGCAGTACATCTACGTATTAGTCATCGCTAT
TACCATGGTGTATGCGGTTTTGGCAGTACACCAATGGGCGTGGATAGCGGTTTACTCAGGGGATTTCCAAGTCTCCACCCATTGACGTCAATGGGAGTTTGTTTTGGCACCAAAATCAACGGGACTT
TCCAAAATGTCTGTAATAACCCCGCCCGTTGACGCAATGGGCGTAGGCGTGTACGGTGGGAGGCTTATATAAGCAGagactcGTTTAGTGAACCgAAAAGCCCTCGGCCCGGGAGCCCTAAAAAGGC
GCCACCATGTACTCGGGAGCCGCCCCGCACCTGCACCTCCTGCGCCCGCCCCCATCCAGGATATGCCTTCAAGCCTCCACCTAGACCCGACTTTGGGACCTCCGGGAGAACAAATCAAATTCACG
GCCAATTTCTTCGAAATGGACATCCCCAAAATGACATCTATCATTATGAAATGGATATCAAGCCAGAGAAGTGCCTGAGGggtagcCACCATGACTTCGAAAAGTTTAT
GATCCAGAACAAAGGAAACGGATGATAACTGGTCCGCAGTGGTGGGCCAGATGTAACAATAAATGAATGTTCTTGATTCATTTATTAATTAATATGATTTCAGAAAAACATGCAGAAAATGCTGTATTTTTT
TTACATGGTAACCGGCCCTCTTCTTATTTATGGGACATGTTGTGCCACATATTGAGCCAGTAGCGCGGTGATTATACAGACCTTATTTGGTATGGGCAAAATCAGGCAAAATCTGGTAATGGTCTTAT
AGGTACTTTGATCATTACAAATATCTTACTGCATGGTTTGAACCTCTTAATTTACCAAGAAGATCATTGTTGTCGGCCATGATTGGGGTCTGTTTGGCATTTTATATAGCTATGAGCATCAAGAT
AAGATCAAAGCAATAGTTCACGCTGAAAGTGTAGTAGATGTGATTGAATCATGGGATGAATGGCCTGATATTGAAGAAGATATTGCGTTGATCAAATCTGAAGAAGGAGAAAAAATGGTTTTGGAGAAT
AATCTTTCGTGAAACCATGTTGCCATCAAAAATCATGAGAAAAGTTAGAACCAGAAAGAAATTTGCAGCATATCTTGAACCATTCAAAGAGAAAAGGTGAAGTTTCGTCTCCACATTATCATGGCCTCGT
GAAATCCCCTTAGTAAAAGGTGGTAAACCTGACGTTGTACAAAATTTGTTAGGAATATAATGCTTATCTACGTGCAAGTGTGATTACCAAAAATGTTTATGAATCGGACCCAGGATTTCTTTCCAAT
GCTATTGTTGAAGGTGCCAAGAAGTTTCTTAATACTGAATTTGTCAAAGTAAAAGGTCTTCATTTTTTCGCAAGAAGATGCACCTGATGAAAATGGGAAAAATATATCAAATCGTTTCGTTGAGCGAGTTCTC
AAAAATGAACAATAAATCTAGAGCGGCCGTTTCGAGCAGACATGATAAGATACATTGATGAGTTTGGACAAACCACAAC TAGAATGCAGTGAAAAAAATGCTTTATTTGTGAAATTTGTGTATGCTATTG
CTTTATTTGTAACCATTATAAGCTGCAATAAACAAAGTTAACAAACAATTCGATTCATTTTATGTTTTCAGGTTTCAGGGGGAGGTGTGGGAGGTTTTTTAAAGCAAGTAAAACCTCTACAAATGTGGTA
AAATCGATAAGGATCCAGGTGGCACTTTTCGGGGAAATGTGCGCGGAACCCCTATTTGTTTATTTTCTAAATACATTCAAATATGTATCCGCTCATGAGACAATAACCTGATAAATGCTTCAATAAT
ATTGAAAAAGGAAGAGTATGAGTATTCAACATTTCCGTTGTCGCCCTTATTCCTTTTTTTCGGGCATTTTGCCTTCTGTTTGTCTCACCCAGAACCGTGGTGAAGTAAAAGATGCTGAAGATCAGT
TGGGTGCACGAGTGGGTTACATCGAACTGGATCTCAACAGCGGTAAGATCCTTGAGAGTTTTTCGCCCCGAAAGCAGTTTTTCCAATGATGAGCACTTTTAAAGTTCGTATGTGGCGCGGTATTATCCC
GTATTGACGCGCGGCAAGAGCAACTCGGTCGCGCATAACATATTCTCAGAAATGACTTGGTTGAGTACTCACAGTACAGAAAAGCATCTTACGGATGGCATGACAGTAAGAGAATTTATGAGTGTCTG
CCATAACCATGAGTGATAAACAATGCGGCCAATTACTTCTGACAACGATCGGAGGACCGAAGGAGCTAACCGCTTTTTTGCACAACATGGGGGATCATGTAACCTCGCCTTGATCGTTGGGAACCGGAGC
TGAATGAAGCCATACCAAAACGACGAGCGTGACACCAGATGCCTGTAGCAATGGCAACAACGTTGCGCAAACTATTAACCTGGCGAACTACTTACTCTAGCTTCCCGGCAACAATTAATAGACTGGATGG
AGGCGGATAAAGTTGCAGGACCCTTCTGCGCTCGGCCCTTCCGGCTGGCTGGTTTATGCTGATAAATCTGGAGCCGGTGGAGCGTGGGTTCTCGCGGTATCATTGCAGCACTGGGGCCAGATGGTAAGC
CTCCCGTATCGTAGTTATCTACACGACGGGAGTCAAGCAACTATGGATGAACGAAATAGACAGATCGCTGAGATAGGTGCCTCACTGATTAAGCATTTGGTAACTGTGACACCAAGTTTACTCATATA
TACTTTAGATTGATTTAAAACCTCATTTTTTAATTTAAAAGGATCTAGGTGAAGATCCTTTTTGATAATCTCATGACCAAAATCCCTTAACGTGAGTTTTTCTGTTCCACTGAGCGTCAAGCCCCGTAGAAA
AGATCAAAGGATCTTCTTGAGATCCTTTTTTCTGCGCTAATCTGCTGCTTGCAAAACAAAAAACACCCGCTACCAGCGTGGTTTTGTTTGGCCGATCAAGAGCTACCAACTCTTTTTCCGAAGGTAA
CTGGCTTTCAGCAGAGCGCAGATACCAAACTGTTCTTCTAGTGTAGCCGTAGTTAGGCCACCCTTCAAGAACTCTGTAGCACCGCCTACATACCTCGCTCTGCTAATCTGTTACCAGTGGCTGCTG
CCAGTGGCGATAAGTCGTGCTTACCGGGTTGGACTCAAGACGATAGTTACCGGATAAGGCGCAGCGGTCCGGCTGAACGGGGGGTTCGTGCACACAGCCCAGCTTGGAGCGAACGACCTACACCGAAC
TGAGATACCTACAGCGTGAGCTATGAGAAAAGCGCCACGCTTCCCGAAGGGAGAAAAGGCGGCACAGGTATCCGGTAAGCGGCAGGGTTCGGAACAGGAGAGCGCACGAGGGAGCTTCCAGGGGGAAACGCCT
GGTATCTTTATAGTCTGTGCTGGTTTCGCCACCTCTGACTTGAGCGTCGATTTTGTGTATGCTCGTCAGGGGGGCGGAGCCTATGGAAAAACGCCAGCAACCGCGCCTTTTACGGTTCCTGGCCTTTT
GCTGGCCTTTTGTCTACATGGCTCGAC

**Table S4:** Distribution of predicted RNA duplex motifs GC-helix, AU-helix, GC-duplex, and AU-duplex. RNA sequences were classified in five groups a) human Ago-like Argonautes, b) non-human Argonautes (Ago- and PIWI-like), c) human mRNAs, d) non-coding RNAs, and e) shuffled mRNAs (for accession numbers of RNA sequences see Table S2). Each sequence (except for non-coding RNAs) is sub-divided into three regions (i) 5'-region (5'-UTR + 200 nt), (ii) rCDS (remaining coding sequence), and (iii) 3'-UTR (see also Figure 2B). Analysis of secondary structure motif abundance is based on three secondary structure prediction approaches (i) sliding window (window size = 800 nt, step width = 20 nt, based on Mfold 2.3), (ii) Mfold 3.4, and (iii) Sfold 2.2. Abundance of structural motifs is given in motifs per 100 nt. Numbers in brackets indicate absolute number of helices found in each group. Absolute numbers are not directly comparable among the three approaches, since not all sequences could be fold by Sfold 2.2 and Mfold 3.4, respectively, due to length restrictions for input sequences on the online servers. Parameters for definition of the four structural motifs are provided in Table S1.

| GC helix <sup>1</sup>    | 5'-region              |           |           | rCDS                   |          |          | 3'-UTR                 |          |          |
|--------------------------|------------------------|-----------|-----------|------------------------|----------|----------|------------------------|----------|----------|
|                          | sliding win (mfold2.3) | mfold3.4  | sfold2.2  | sliding win (mfold2.3) | mfold3.4 | sfold2.2 | sliding win (mfold2.3) | mfold3.4 | sfold2.2 |
| hAgo                     | 0.24 (7)               | 0.07 (2)  | 0.03 (1)  | 0 (0)                  | 0.01 (1) | 0.01 (1) | 0 (0)                  | 0 (0)    | 0 (0)    |
| none-h Argo              | 0.07 (12)              | 0.06 (11) | 0.04 (7)  | 0.00 (2)               | 0 (0)    | 0 (0)    | 0 (0)                  | 0 (0)    | 0 (0)    |
| human mRNA               | 0.08 (32)              | 0.06 (23) | 0.04 (15) | 0.01 (11)              | 0.00 (6) | 0.00 (5) | 0.00 (2)               | 0.00 (1) | 0.00 (1) |
| shuffled mRNA            | 0.01 (4)               | 0.01 (4)  | n/a       | 0.00 (1)               | 0.00 (1) | n/a      | 0.00 (4)               | 0.00 (1) | n/a      |
| <b>complete sequence</b> |                        |           |           |                        |          |          |                        |          |          |
| non-coding               |                        |           |           | 0 (0)                  | 0 (0)    | 0 (0)    |                        |          |          |

<sup>1</sup> ≥ 8 uninterrupted GC pairs, strand distance ≥ 40 nt, ≥ 16 nt in linker region involved in base pairings

| AU helix <sup>2</sup>    | 5'-region              |          |          | rCDS                   |           |          | 3'-UTR                 |           |           |
|--------------------------|------------------------|----------|----------|------------------------|-----------|----------|------------------------|-----------|-----------|
|                          | sliding win (mfold2.3) | mfold3.4 | sfold2.2 | sliding win (mfold2.3) | mfold3.4  | sfold2.2 | sliding win (mfold2.3) | mfold3.4  | sfold2.2  |
| hAgo                     | 0 (0)                  | 0 (0)    | 0 (0)    | 0 (0)                  | 0 (0)     | 0 (0)    | 0.03 (3)               | 0.02 (2)  | 0.03 (2)  |
| none-h Argo              | 0.01 (1)               | 0.01 (1) | 0.01 (1) | 0.00 (3)               | 0.00 (5)  | 0.00(4)  | 0.02 (10)              | 0.00 (2)  | 0.00(6)   |
| human mRNA               | 0.00 (1)               | 0.02 (7) | 0.01 (5) | 0 (0)                  | 0.00 (7)  | 0 (0)    | 0.03 (35)              | 0.03 (33) | 0.02 (17) |
| shuffled mRNA            | 0 (0)                  | 0.01 (4) | n/a      | 0.00 (1)               | 0 (0)     | n/a      | 0 (0)                  | 0 (0)     | n/a       |
| <b>complete sequence</b> |                        |          |          |                        |           |          |                        |           |           |
| non-coding               |                        |          |          | 0.02 (70)              | 0.03 (15) | 0.02 (2) |                        |           |           |

<sup>2</sup> ≥ 8 uninterrupted AU pairs, strand distance ≥ 40 nt, ≥ 16 nt in linker region involved in base pairings

| GC duplex <sup>4</sup> | 5'-region              |            |            | rCDS                   |            |            | 3'-UTR                 |            |           |
|------------------------|------------------------|------------|------------|------------------------|------------|------------|------------------------|------------|-----------|
|                        | sliding win (mfold2.3) | mfold3.4   | sfold2.2   | sliding win (mfold2.3) | mfold3.4   | sfold2.2   | sliding win (mfold2.3) | mfold3.4   | sfold2.2  |
| human mRNA, n=12       | 0.01 (4)               | 0.01 (2)   | 0.01 (2)   | 0 (0)                  | 0 (0)      | 0 (0)      | 0 (0)                  | 0 (0)      | 0 (0)     |
| human mRNA, n=11       | 0.02 (9)               | 0.01 (4)   | 0.01 (4)   | 0 (0)                  | 0 (0)      | 0 (0)      | 0 (0)                  | 0 (0)      | 0 (0)     |
| human mRNA, n=10       | 0.02 (9)               | 0.01 (4)   | 0.01 (4)   | 0 (0)                  | 0 (0)      | 0 (0)      | 0 (0)                  | 0 (0)      | 0 (0)     |
| human mRNA, n=9        | 0.05 (18)              | 0.03 (10)  | 0.02 (8)   | 0.00 (1)               | 0.00 (1)   | 0.00 (1)   | 0 (0)                  | 0 (0)      | 0 (0)     |
| human mRNA, n=8        | 0.1 (37)               | 0.07 (28)  | 0.06 (20)  | 0.01 (13)              | 0.00 (7)   | 0.00 (6)   | 0.00 (2)               | 0.00 (1)   | 0.00 (1)  |
| human mRNA, n=7        | 0.2 (75)               | 0.18 (67)  | 0.12 (42)  | 0.02 (37)              | 0.01 (19)  | 0.01 (13)  | 0.00 (4)               | 0.00 (3)   | 0.00 (3)  |
| human mRNA, n=6        | 0.48 (181)             | 0.42 (159) | 0.25 (91)  | 0.08 (146)             | 0.04 (70)  | 0.03 (51)  | 0.02 (22)              | 0.01 (9)   | 0.01 (9)  |
| human mRNA, n=5        | 1.16 (438)             | 1.04 (391) | 0.55 (197) | 0.34 (591)             | 0.13 (231) | 0.10 (167) | 0.13 (125)             | 0.05 (51)  | 0.04 (34) |
| shuffled mRNA, n=9     | 0.00 (2)               | 0.00 (1)   | n/a        | 0 (0)                  | 0 (0)      | n/a        | 0 (0)                  | 0 (0)      | n/a       |
| shuffled mRNA, n=8     | 0.01 (4)               | 0.01 (4)   | n/a        | 0.00 (1)               | 0.00 (1)   | n/a        | 0.00 (4)               | 0.00 (1)   | n/a       |
| shuffled mRNA, n=7     | 0.02 (13)              | 0.03 (20)  | n/a        | 0.01 (21)              | 0.01 (13)  | n/a        | 0.02 (23)              | 0.01 (10)  | n/a       |
| shuffled mRNA, n=6     | 0.08 (60)              | 0.09 (69)  | n/a        | 0.08 (122)             | 0.04 (66)  | n/a        | 0.06 (81)              | 0.03 (40)  | n/a       |
| shuffled mRNA, n=5     | 0.36 (288)             | 0.40 (321) | n/a        | 0.37 (604)             | 0.18 (289) | n/a        | 0.31 (403)             | 0.12 (151) | n/a       |

| GC duplex <sup>5</sup> | complete sequence      |           |           |
|------------------------|------------------------|-----------|-----------|
|                        | sliding win (mfold2.3) | mfold3.4  | sfold2.2  |
| non-coding, n= 8       | 0 (0)                  | 0 (0)     | 0 (0)     |
| non-coding, n=7        | 0.00 (2)               | 0.00 (1)  | 0.00 (1)  |
| non-coding, n=6        | 0.01 (23)              | 0.02 (14) | 0.02 (7)  |
| non-coding, n=5        | 0.05 (160)             | 0.12 (79) | 0.08 (24) |

<sup>4</sup>≥ n uninterrupted GC pairs

| AU duplex <sup>5</sup> | 5'-region              |           |           | rCDS                   |            |           | 3'-UTR                 |            |            |
|------------------------|------------------------|-----------|-----------|------------------------|------------|-----------|------------------------|------------|------------|
|                        | sliding win (mfold2.3) | mfold3.4  | sfold2.2  | sliding win (mfold2.3) | mfold3.4   | sfold2.2  | sliding win (mfold2.3) | mfold3.4   | sfold2.2   |
| human mRNA, n=12       | 0 (0)                  | 0.01 (3)  | 0.01 (4)  | 0 (0)                  | 0.00 (4)   | 0 (0)     | 0.01 (10)              | 0.01 (9)   | 0.00 (4)   |
| human mRNA, n=11       | 0 (0)                  | 0.01 (3)  | 0.01 (4)  | 0 (0)                  | 0.00 (4)   | 0 (0)     | 0.01 (15)              | 0.01 (13)  | 0.01 (7)   |
| human mRNA, n=10       | 0 (0)                  | 0.01 (3)  | 0.01 (4)  | 0 (0)                  | 0.00 (4)   | 0 (0)     | 0.02 (20)              | 0.02 (18)  | 0.01 (11)  |
| human mRNA, n=9        | 0.00 (1)               | 0.01 (3)  | 0.01 (4)  | 0 (0)                  | 0.00 (4)   | 0 (0)     | 0.03 (35)              | 0.03 (29)  | 0.02 (17)  |
| human mRNA, n=8        | 0.01 (2)               | 0.02 (7)  | 0.01 (5)  | 0 (0)                  | 0.00 (7)   | 0 (0)     | 0.06 (71)              | 0.05 (50)  | 0.03 (28)  |
| human mRNA, n=7        | 0.01 (3)               | 0.02 (9)  | 0.01 (5)  | 0.01 (10)              | 0.01 (19)  | 0.00 (4)  | 0.13 (157)             | 0.08 (92)  | 0.05 (48)  |
| human mRNA, n=6        | 0.03 (12)              | 0.05 (20) | 0.03 (10) | 0.03 (44)              | 0.03 (50)  | 0.01 (18) | 0.31 (378)             | 0.16 (180) | 0.10 (98)  |
| human mRNA, n=5        | 0.10 (38)              | 0.18 (68) | 0.06 (23) | 0.10 (174)             | 0.11 (189) | 0.04 (63) | 0.71 (860)             | 0.33 (370) | 0.19 (182) |
| shuffled mRNA, n=9     | 0 (0)                  | 0 (0)     | n/a       | 0 (0)                  | 0 (0)      | n/a       | 0 (0)                  | 0 (0)      | n/a        |
| shuffled mRNA, n=8     | 0 (0)                  | 0.01 (4)  | n/a       | 0.00 (2)               | 0.00 (1)   | n/a       | 0 (0)                  | 0 (0)      | n/a        |
| shuffled mRNA, n=7     | 0.00 (3)               | 0.01 (10) | n/a       | 0.01 (10)              | 0.00 (2)   | n/a       | 0 (1)                  | 0 (0)      | n/a        |
| shuffled mRNA, n=6     | 0.02 (14)              | 0.03 (21) | n/a       | 0.03 (41)              | 0.01 (15)  | n/a       | 0.01 (13)              | 0.01 (9)   | n/a        |
| shuffled mRNA, n=5     | 0.11 (84)              | 0.10 (82) | n/a       | 0.12 (201)             | 0.04 (69)  | n/a       | 0.09 (117)             | 0.04 (48)  | n/a        |

| AU duplex <sup>5</sup> | complete sequence      |            |           |
|------------------------|------------------------|------------|-----------|
|                        | sliding win (mfold2.3) | mfold3.4   | sfold2.2  |
| non-coding, n= 12      | 0.00 (4)               | 0.00 (2)   | 0.00 (1)  |
| non-coding, n= 9       | 0.01 (34)              | 0.01 (6)   | 0.01 (2)  |
| non-coding, n= 8       | 0.03 (104)             | 0.03 (20)  | 0.01 (3)  |
| non-coding, n=7        | 0.09 (281)             | 0.07 (43)  | 0.01 (4)  |
| non-coding, n=6        | 0.22 (281)             | 0.13 (87)  | 0.04 (11) |
| non-coding, n=5        | 0.60 (1955)            | 0.41 (270) | 0.10 (32) |

<sup>5</sup>≥ n uninterrupted AU pairs
